# Supplementary material for: Spin engineering of triangulenes and application for nano nonlinear optical materials design
Source: Royal Society of Chemistry journal article supplement (doi:10.1039/d2cp02915d), 2022-01-01
Supplement: d2cp02915d1.pdf [file d2cp02915d1.pdf]

## Supporting Information

### Spin engineering of triangulenes and application for nano nonlinear optical materials design

Cui-Cui Yang,<sup>a</sup> Xue-Lian Zheng,<sup>a</sup> Jiu Chen,<sup>a</sup> Wei Quan Tian,<sup>\*a</sup> Wei-Qi Li,<sup>\*bcd</sup> Ling Yang,<sup>\*e</sup>

<sup>a</sup> Chongqing Key Laboratory of Theoretical and Computational Chemistry, College of Chemistry and Chemical Engineering, Chongqing University, Huxi Campus, Chongqing 401331, P. R. China

<sup>b</sup> Department of Physics, Harbin Institute of Technology, Harbin 150001, P. R. China

<sup>c</sup> Technology Innovation Center of Materials and Devices at Extreme Environment, School of Materials Science and Engineering, Harbin Institute of Technology, Harbin 150001, China

<sup>d</sup> Collaborative Innovation Center of Extreme Optics, Shanxi University, Taiyuan 030006, P. R. China

<sup>e</sup> Wenzhou Institute, University of Chinese Academy of Sciences, 1 Jinlian Street, Wenzhou 325001, China

\*Corresponding author: tianwq@cqu.edu.cn; tccliweiqi@hit.edu.cn; yangling@hit.edu.cn

#### Supporting Information list:

**Fig. S1** The structures of (a) B, (b) N, (c) NBN and (d) BNB doped TGn (n=2 to 6). The white, deeppink, black and green denote the hydrogen, boron, carbon and nitrogen atoms, respectively.

**Fig. S2** Evolution of the static first hyperpolarizability ( $\langle\beta_0\rangle$ ) with the numbers of excited states in TG7-BNB-ba.

**Fig. S3** The frontier molecular orbitals of BN doped heptene. The molecular orbitals are predicted with PBE0/6-31G(d,p).

**Fig. S4** The natural atomic spin distributions (spin up: yellow circle, spin down: blue circle) of BN-doped TG7-a/b/ab/ba/c series of molecules and TG7-BNB-ab. Numbers in blue are spin density.

**Fig. S5** The frontier molecular orbitals (plotted with isosurface value of 0.02 a.u.) of TG7 and TG7-ba series of molecules. The molecular orbitals are predicted with PBE0/6-31G(d,p).

**Fig. S6** The transition nature of the electron excitations with major contributions to the  $\langle\beta_0\rangle$  of (a) TG7-B-ba and (b) TG7-N-ba. Molecular orbitals (with isosurface value of 0.02 a.u.) associated with the major electron excitations of these molecules predicted with CAM-B3LYP/6-31++G(d,p).

**Fig. S7** Hole (blue opaque) and electron (yellow opaque) distributions for TG7-B-ba with isosurfaces of 0.0004 and 0.0006 a.u., respectively.

**Fig. S8** Evolution of the  $\langle\beta_0\rangle$  with the electron excitations and the transition nature of the electron excitations with major contributions to the  $\langle\beta_0\rangle$  of TG7-H6-ba, TG7-H6-ba-3NO<sub>2</sub>, TG7-H6-ba-2NO<sub>2</sub>, and TG7-H6-ba-1NO<sub>2</sub>. Hereafter, molecular orbitals (with isosurface value of 0.02 a.u.) associated with the major electron excitations of these molecules predicted with CAM-B3LYP/6-31++G(d,p).  $f$  is the oscillator strength (in a.u.).

**Fig. S9** The transition nature of the electron excitations with major contributions to the  $\langle\beta_0\rangle$  of TG7-NBN-ba.

**Fig. S10** The transition nature of the electron excitations with major contributions to the  $\langle\beta_0\rangle$  of TG7-BNB-ba.

**Fig. S11** The structure of TG7-BNB-ba with Cartesian coordinate, in which the solid line arrow indicates parallel to the paper surface and the dotted arrow indicates outward.

**Fig. S12** The two-dimensional second order nonlinear optical spectra (in  $10^{-30}$  esu) of (a) TG7-B-ba, (b) TG7-N-ba, (c) TG7-NBN-ba, and (d) TG7-BNB-ba scanned up to 7.00 eV with a step size of 0.05 eV.

**Fig. S13** Two-dimensional second order NLO spectra of (a) and (b) TG7-B-ba, (c) and (d) TG7-N-ba, (e) TG7-NBN-ba, and (f) TG7-BNB-ba with step size of 0.005 eV [(a)  $\omega_1$  scanned from 2.50 eV to 3.50 eV and  $\omega_2$  scanned from  $-1.50$  eV to  $-0.50$  eV; (b)  $\omega_1$  scanned from 1.50 eV to 2.50 eV and  $\omega_2$  scanned from 0.50 eV to 1.50 eV; (c)  $\omega_1$  scanned from 1.50 eV to 2.50 eV and  $\omega_2$  scanned from 0.50 eV to 1.50 eV; (d)  $\omega_1$  scanned from 2.50 eV to 3.50 eV and  $\omega_2$  scanned from  $-2.50$  eV to  $-1.50$  eV; (e)  $\omega_1$  scanned from 1.30 eV to 2.30 eV and  $\omega_2$  scanned from  $-0.50$  eV to 0.50 eV; (f)  $\omega_1$  scanned from 1.00 eV to 2.00 eV and  $\omega_2$  scanned from  $-0.50$  eV to 0.50 eV].

**Table S1** The relative electronic energy differences of TGn (n=2 to 7) predicted with (U)PBE0/6-31G(d,p). The doublet in TG2, triplet in TG3, quartet in TG4, quintet in TG5, sextet in TG6, and septet in TG7 are taken as reference, respectively.

**Table S2** The electronic properties including energy gap ( $E_{\text{gap}}$ , in eV) between the highest occupied molecular orbital ( $E_{\text{H}}$ ) and the lowest unoccupied molecular orbital ( $E_{\text{L}}$ ), the lowest vibrational frequency (LVF, in  $\text{cm}^{-1}$ ) and the dipole moment of ground state ( $D_{\text{g}}$ , in Debye), and the static first hyperpolarizability ( $\langle\beta_0\rangle$ , in  $10^{-30}$  esu), the  $\langle\beta_0\rangle$  per heavy atom ( $\langle\beta_0\rangle/N$ ) of TGn (n=2 to 6) series of molecules in closed-shell singlet predicted with PBE0/6-31G(d,p) and TD-CAM-B3LYP/6-31++G(d,p)-SOS, respectively. The relative electronic energy differences ( $\Delta E_{\text{OS-CS}}$  and  $\Delta E_{\text{T-CS}}$ , in Kcal/mol) between open-shell singlet (OS) or triplet (T) and closed-shell singlet (CS) (CS is taken as reference), and spin contamination of open-shell singlet ( $\langle S^2 \rangle$ ) obtained at the UPBE0/6-31G(d,p) level.

**Table S3** Major electronic spectra absorption peaks with transition nature in TG7 series of molecules ( $f$  is the oscillator strength in arbitrary unit,  $E$  is the transition energy in eV unit,  $\lambda$  is the wavelength in nm unit, TNMC to  $\langle\beta_0\rangle$  is the transition nature of electron excitation with major contribution to  $\langle\beta_0\rangle$ ,  $\langle\beta_0\rangle_{\text{con}}$  is contribution value to  $\langle\beta_0\rangle$  in  $10^{-30}$  esu unit).

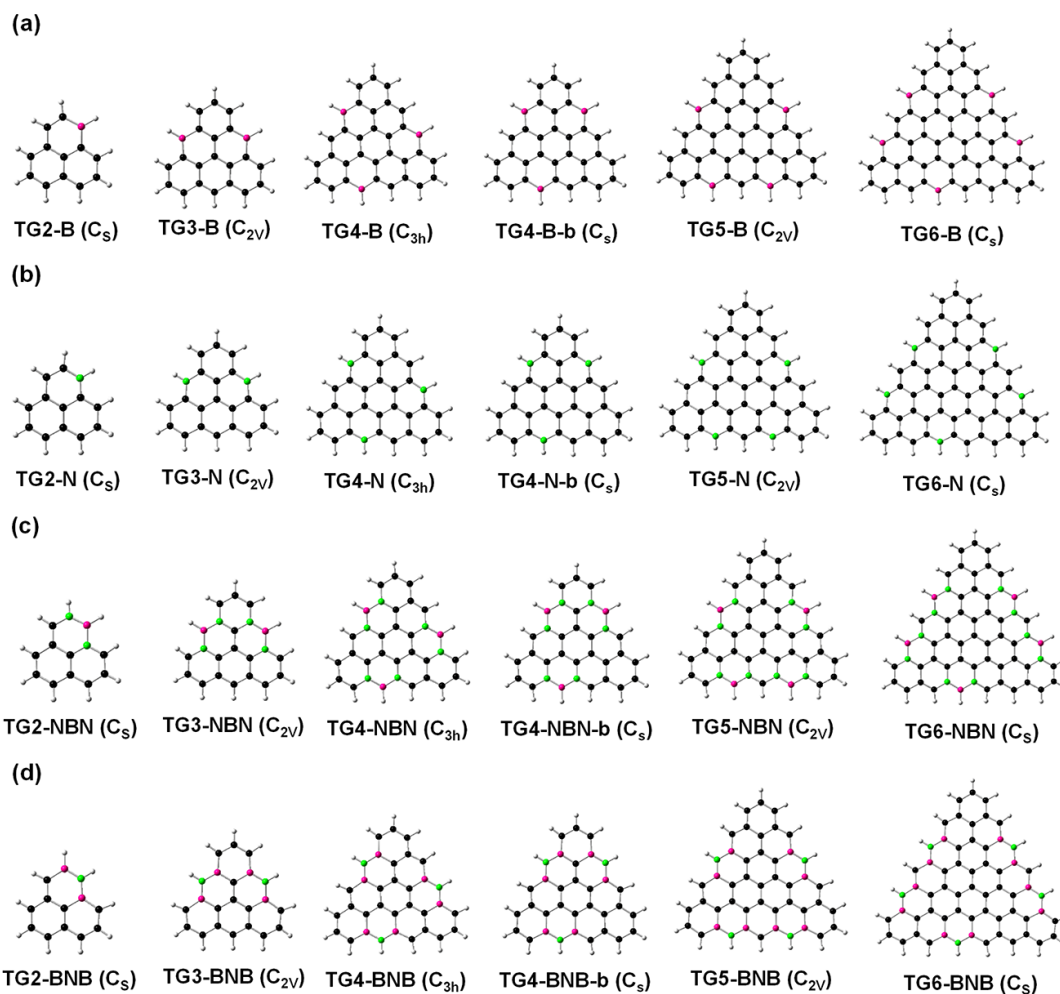

**Fig. S1** The structures of (a) B, (b) N, (c) NBN and (d) BNB doped TGn ( $n=2$  to 6). The white, deeppink, black and green denote the hydrogen, boron, carbon and nitrogen atoms, respectively.

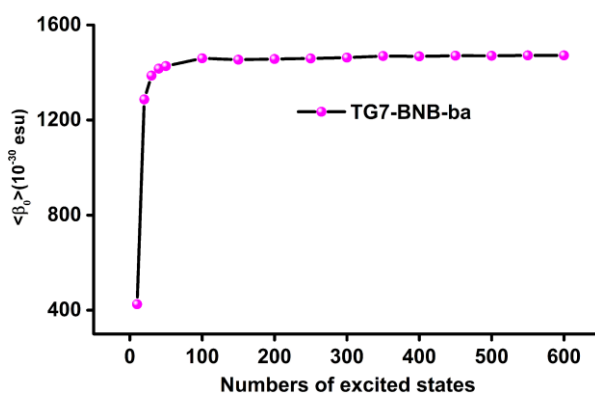

**Fig. S2** Evolution of the static first hyperpolarizability ( $\langle \beta_0 \rangle$ ) with the numbers of excited states in TG7-BNB-ba.

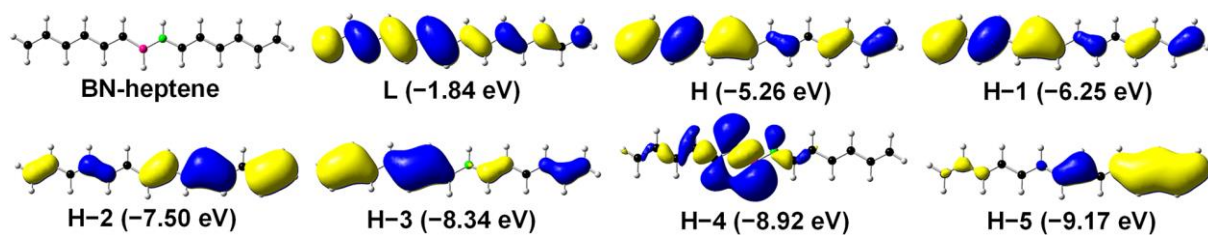

**Fig. S3** The frontier molecular orbitals of BN doped heptene. The molecular orbitals are predicted with PBE0/6-31G(d,p).

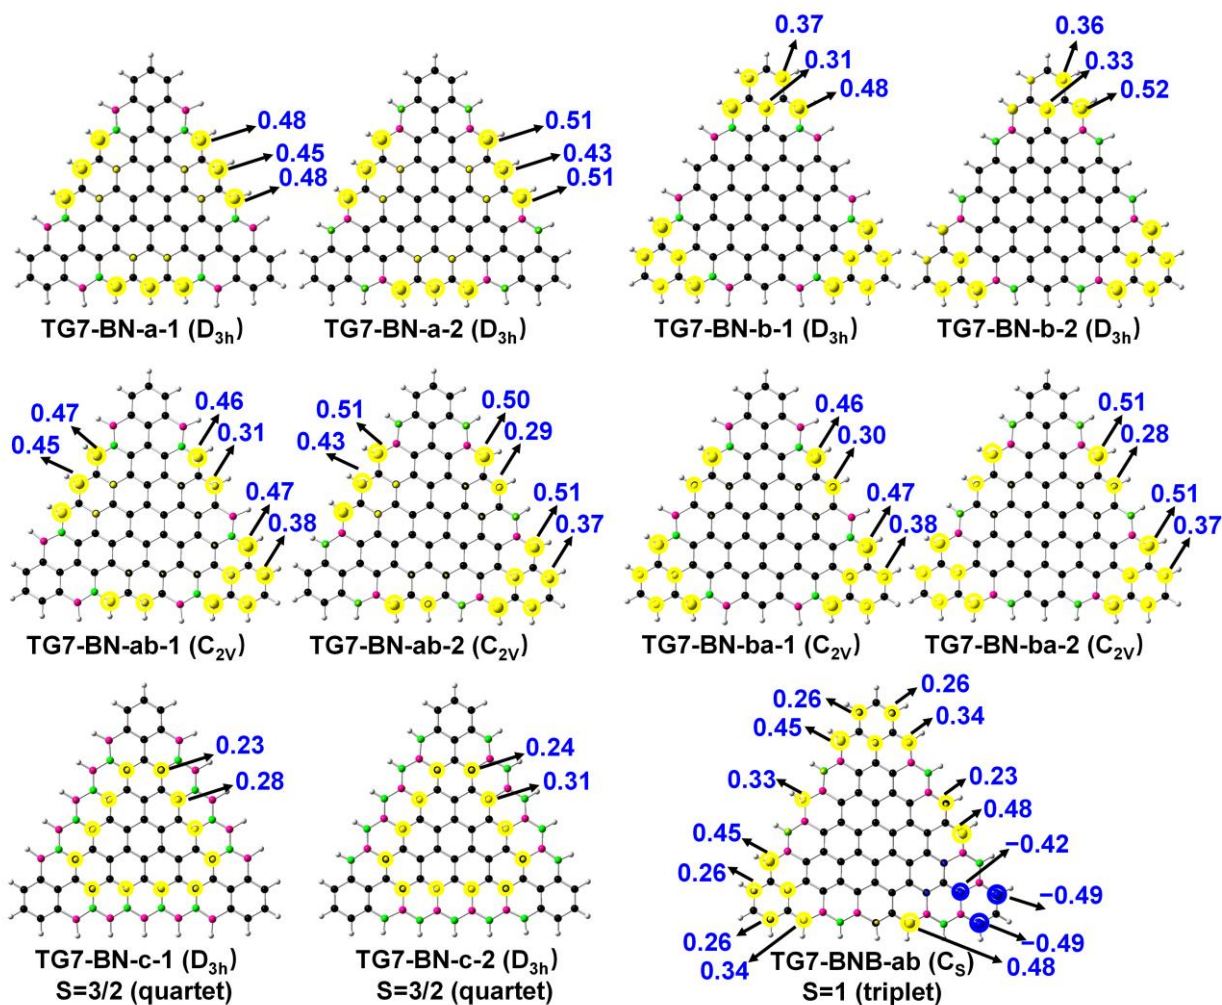

**Fig. S4** The natural atomic spin density distributions (spin up: yellow circle, spin down: blue circle) of BN-doped TG7-a/b/ab/ba/c series of molecules and TG7-BNB-ab. Numbers in blue are spin density.

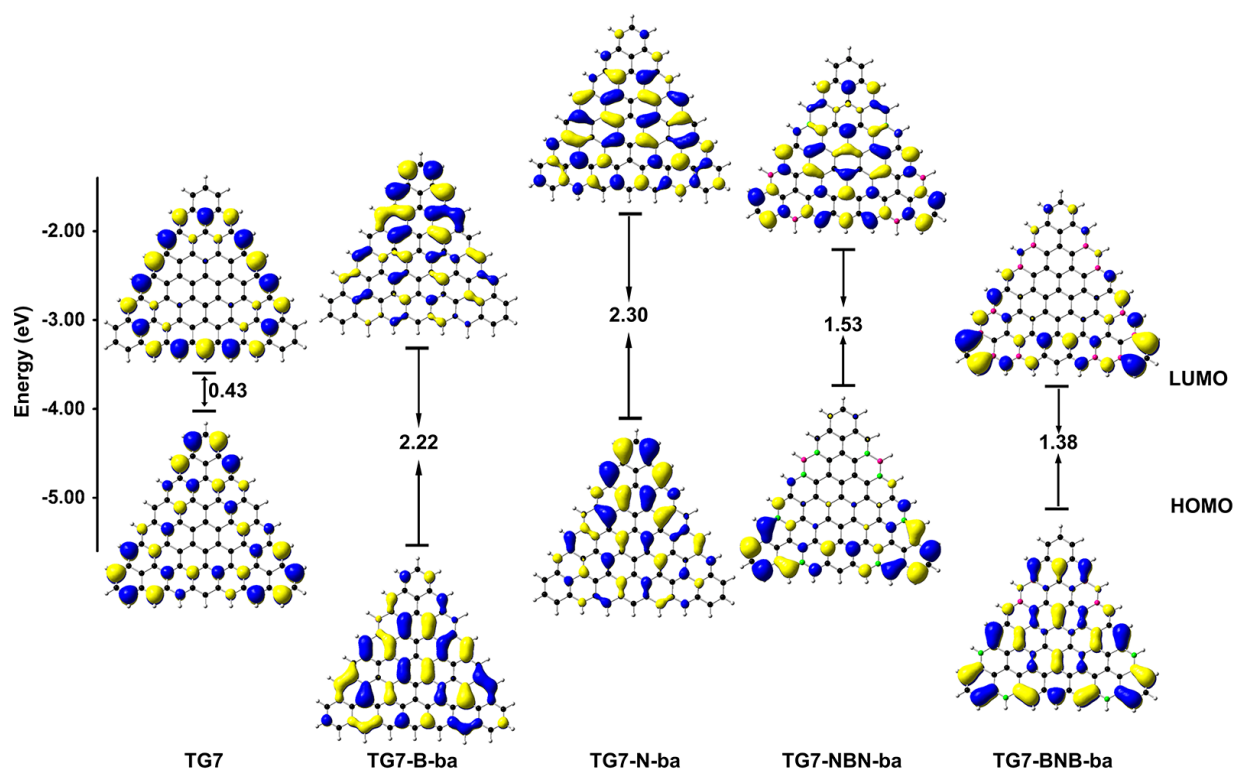

**Fig. S5** The frontier molecular orbitals (plotted with isosurface value of 0.02 a.u.) of TG7 and TG7-ba series of molecules. The molecular orbitals are predicted with PBE0/6-31G(d,p).

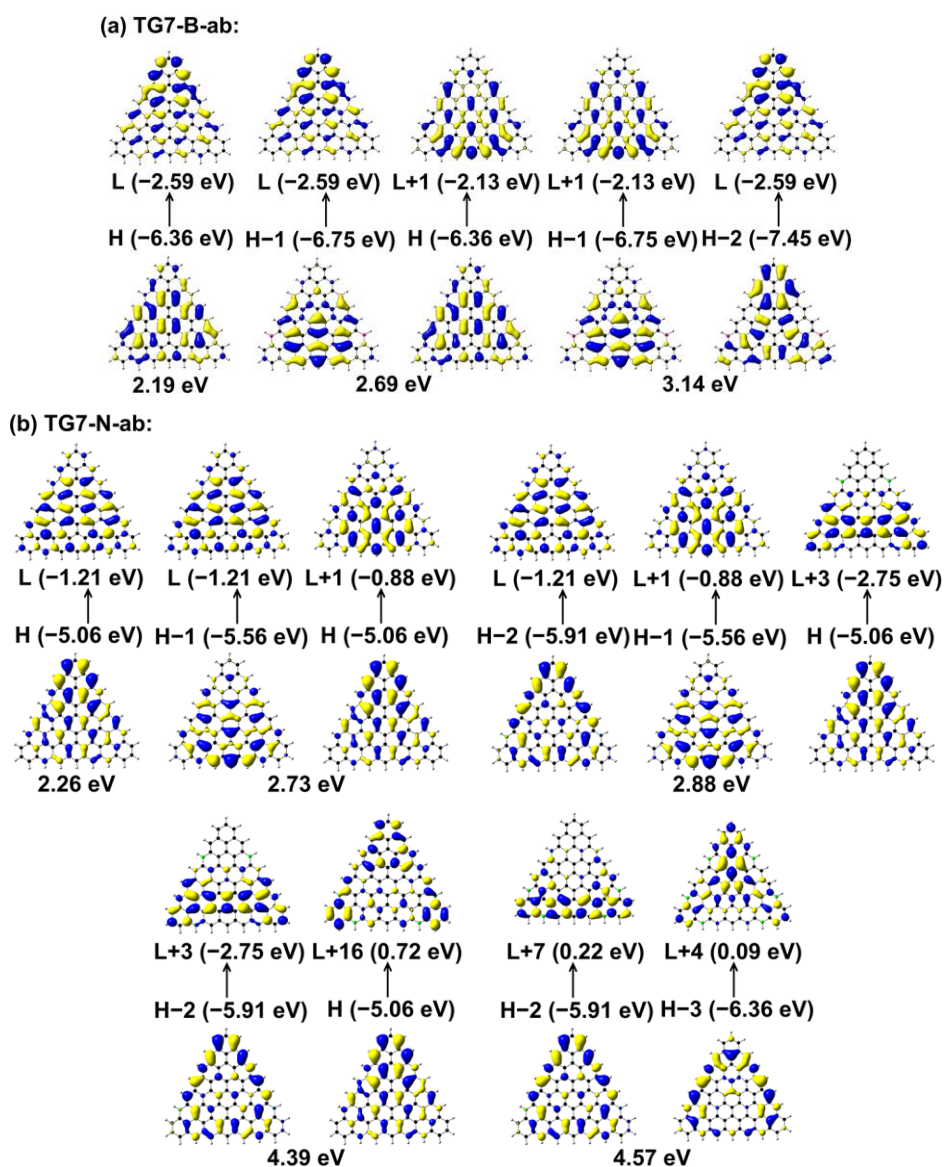

**Fig. S6** The transition nature of the electron excitations with major contributions to the  $\langle\beta_0\rangle$  of (a) TG7-B-ba and (b) TG7-N-ba. Molecular orbitals (with isosurface value of 0.02 a.u.) associated with the major electron excitations of these molecules predicted with CAM-B3LYP/6-31++G(d,p).

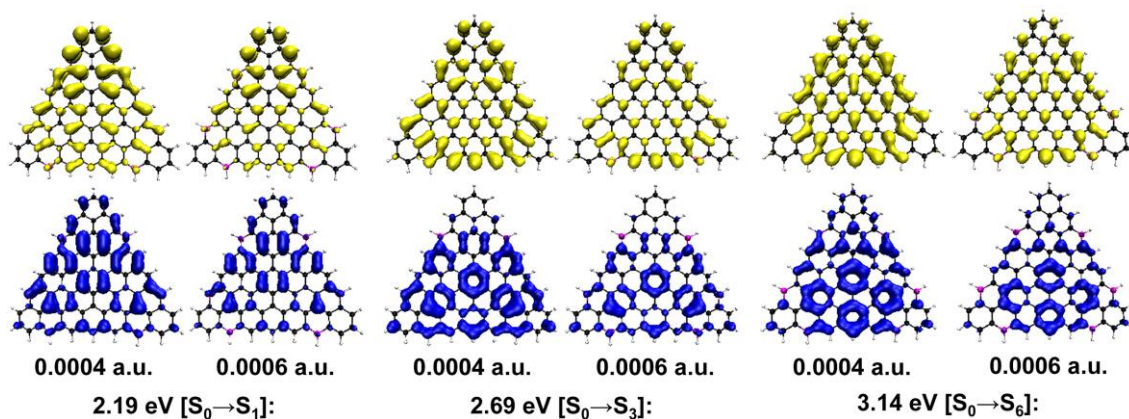

**Fig. S7** Hole (blue opaque) and electron (yellow opaque) distributions for TG7-B-ba with isosurfaces of 0.0004 and 0.0006 a.u., respectively.

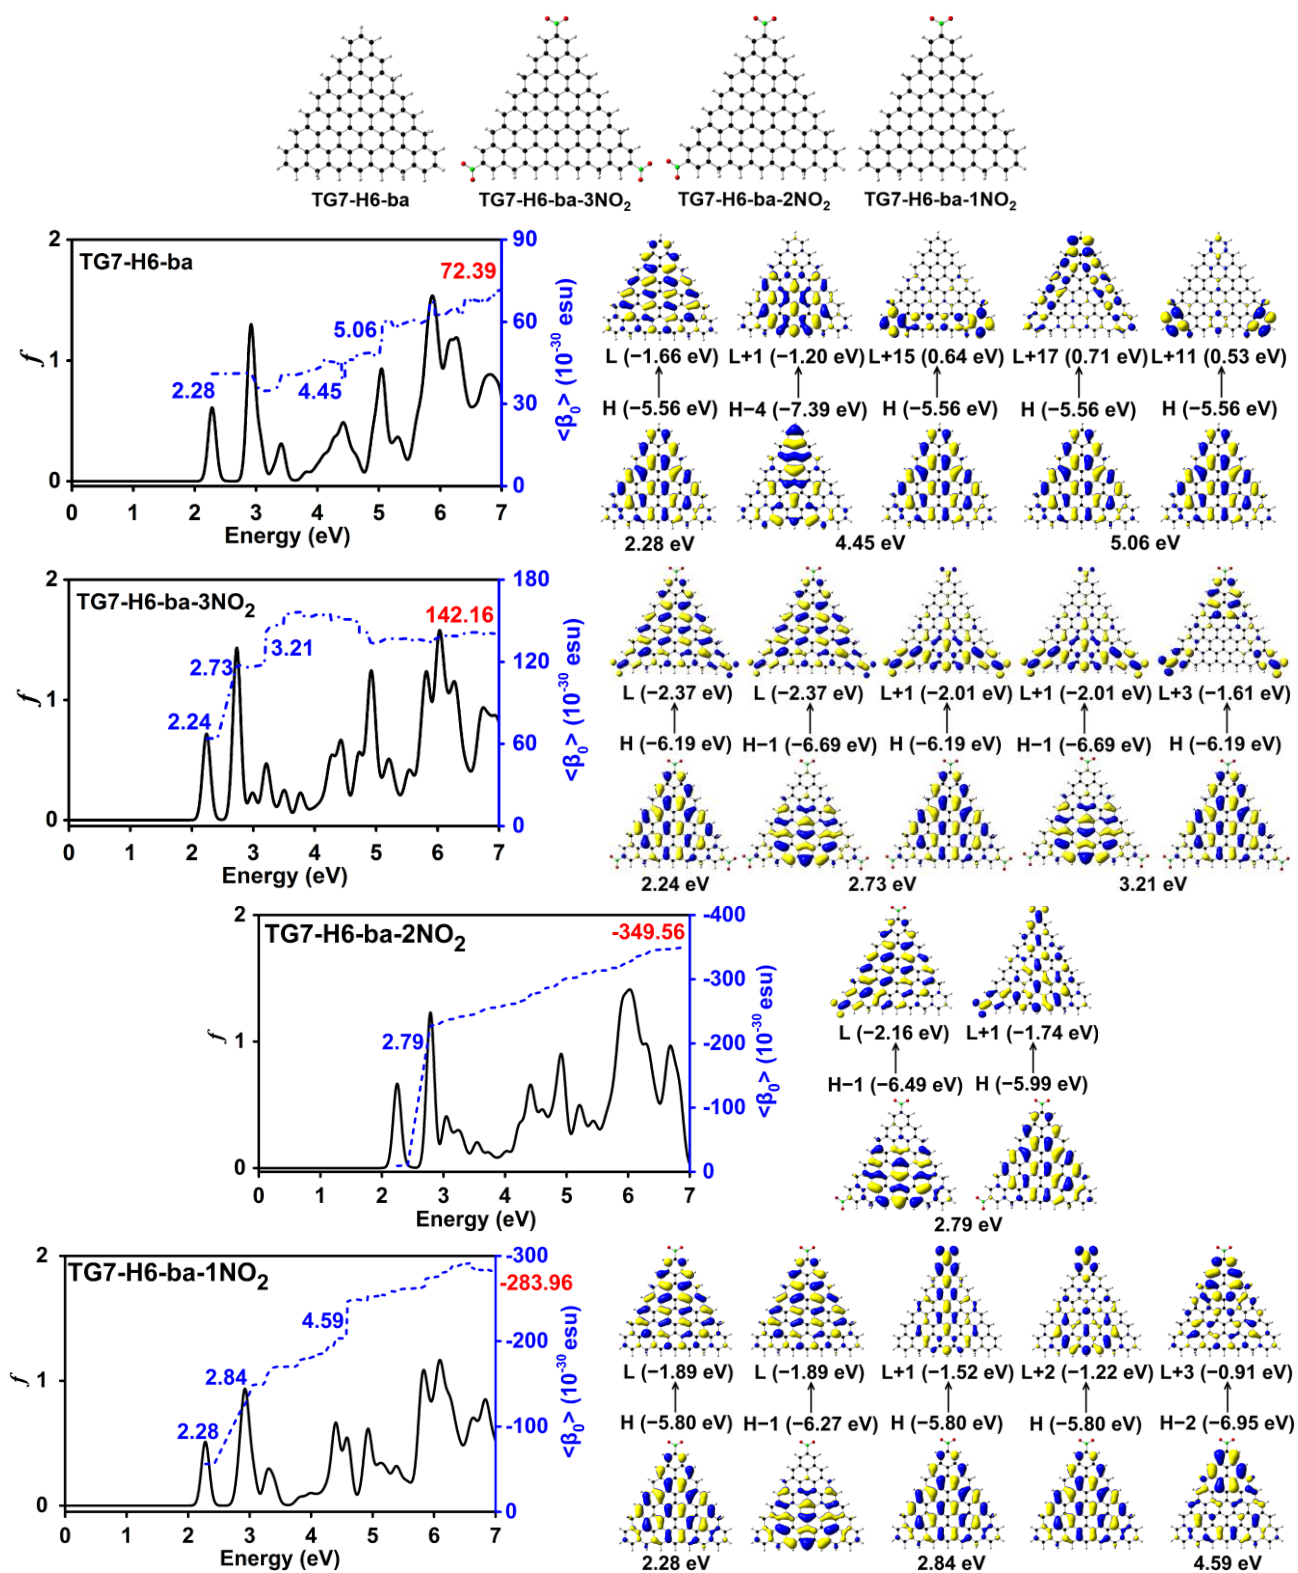

**Fig. S8** Evolution of the  $\langle\beta_0\rangle$  with the electron excitations and the transition nature of the electron excitations with major contributions to the  $\langle\beta_0\rangle$  of TG7-H6-ba, TG7-H6-ba-3NO<sub>2</sub>, TG7-H6-ba-2NO<sub>2</sub>, and TG7-H6-ba-1NO<sub>2</sub>. Hereafter, molecular orbitals (with isosurface value of 0.02 a.u.) associated with the major electron excitations of these molecules predicted with CAM-B3LYP/6-31++G(d,p).  $f$  is the oscillator strength (in a.u.).

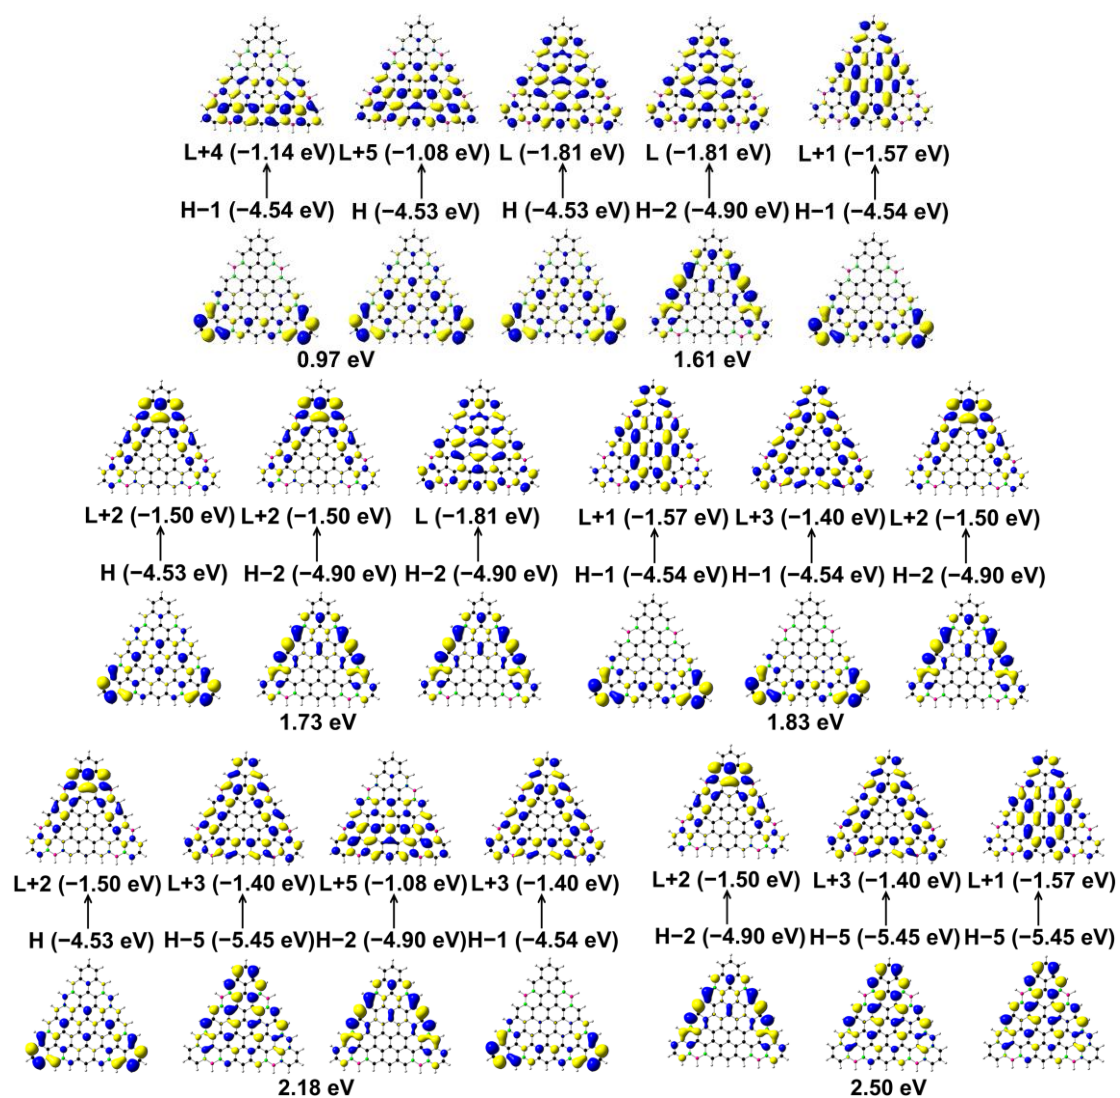

**Fig. S9** The transition nature of the electron excitations with major contributions to the  $\langle\beta_0\rangle$  of TG7-NBN-ba.



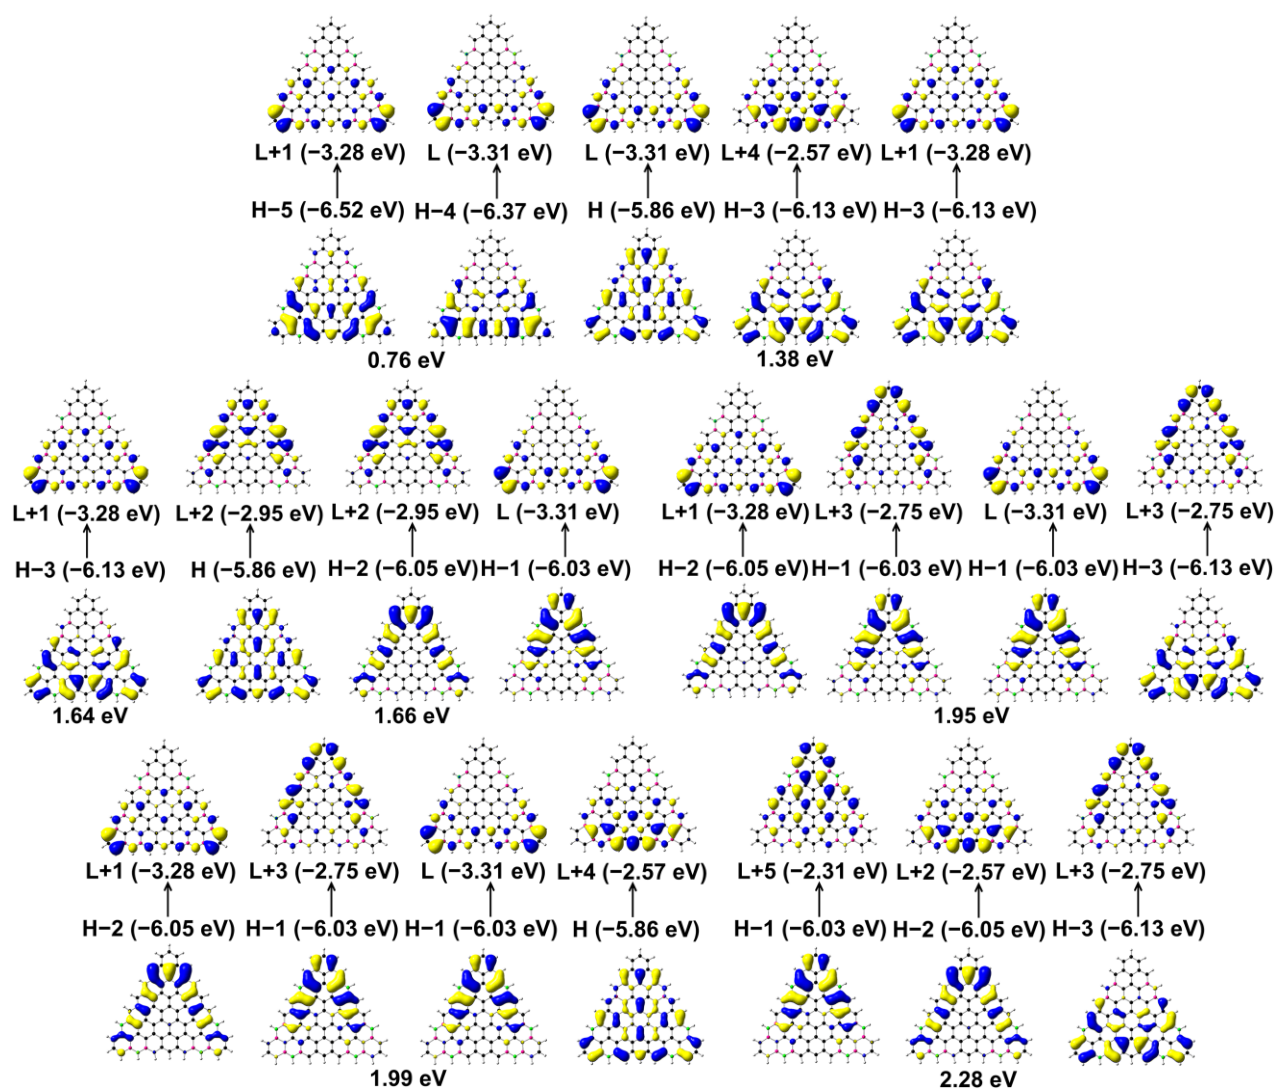

**Fig. S10** The transition nature of the electron excitations with major contributions to the  $\langle\beta_0\rangle$  of TG7-BNB-ba.

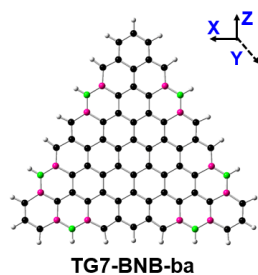

**Fig. S11** The structure of TG7-BNB-ba with Cartesian coordinate, in which the solid line arrow indicates parallel to the paper surface and the dotted arrow indicates outward.

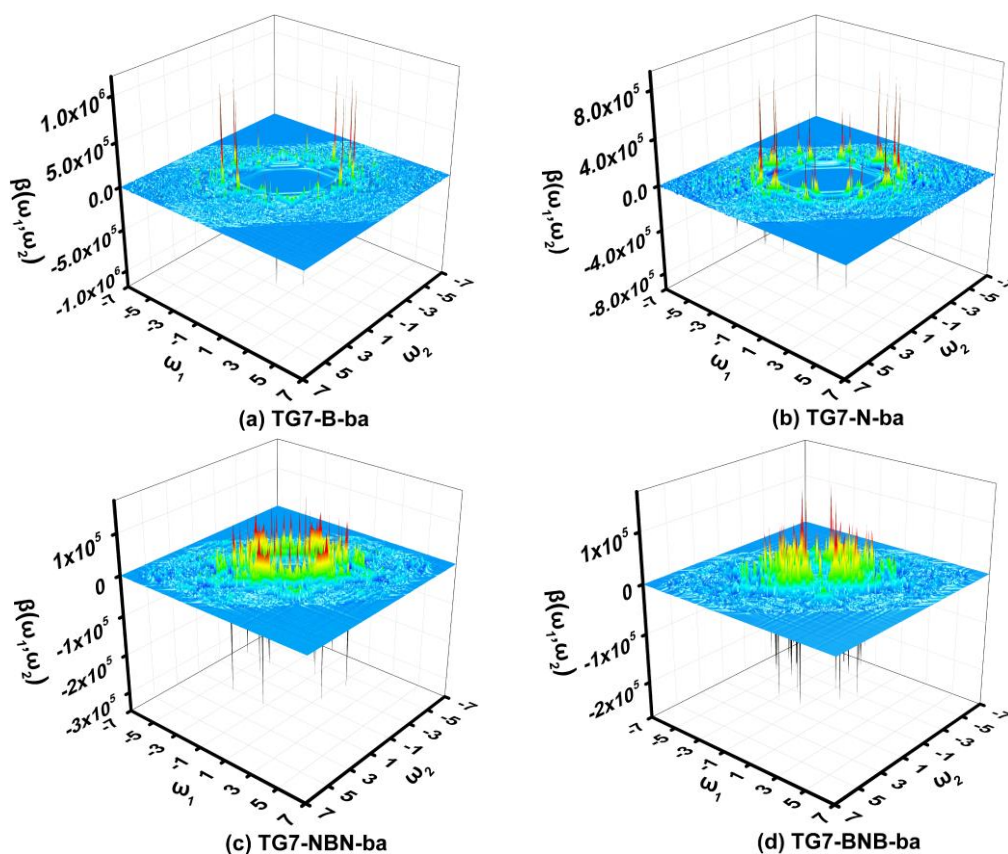

**Fig. S12** The two-dimensional second order nonlinear optical spectra (in  $10^{-30}$  esu) of (a) TG7-B-ba, (b) TG7-N-ba, (c) TG7-NBN-ba, and (d) TG7-BNB-ba scanned up to 7.00 eV with a step size of 0.05 eV.

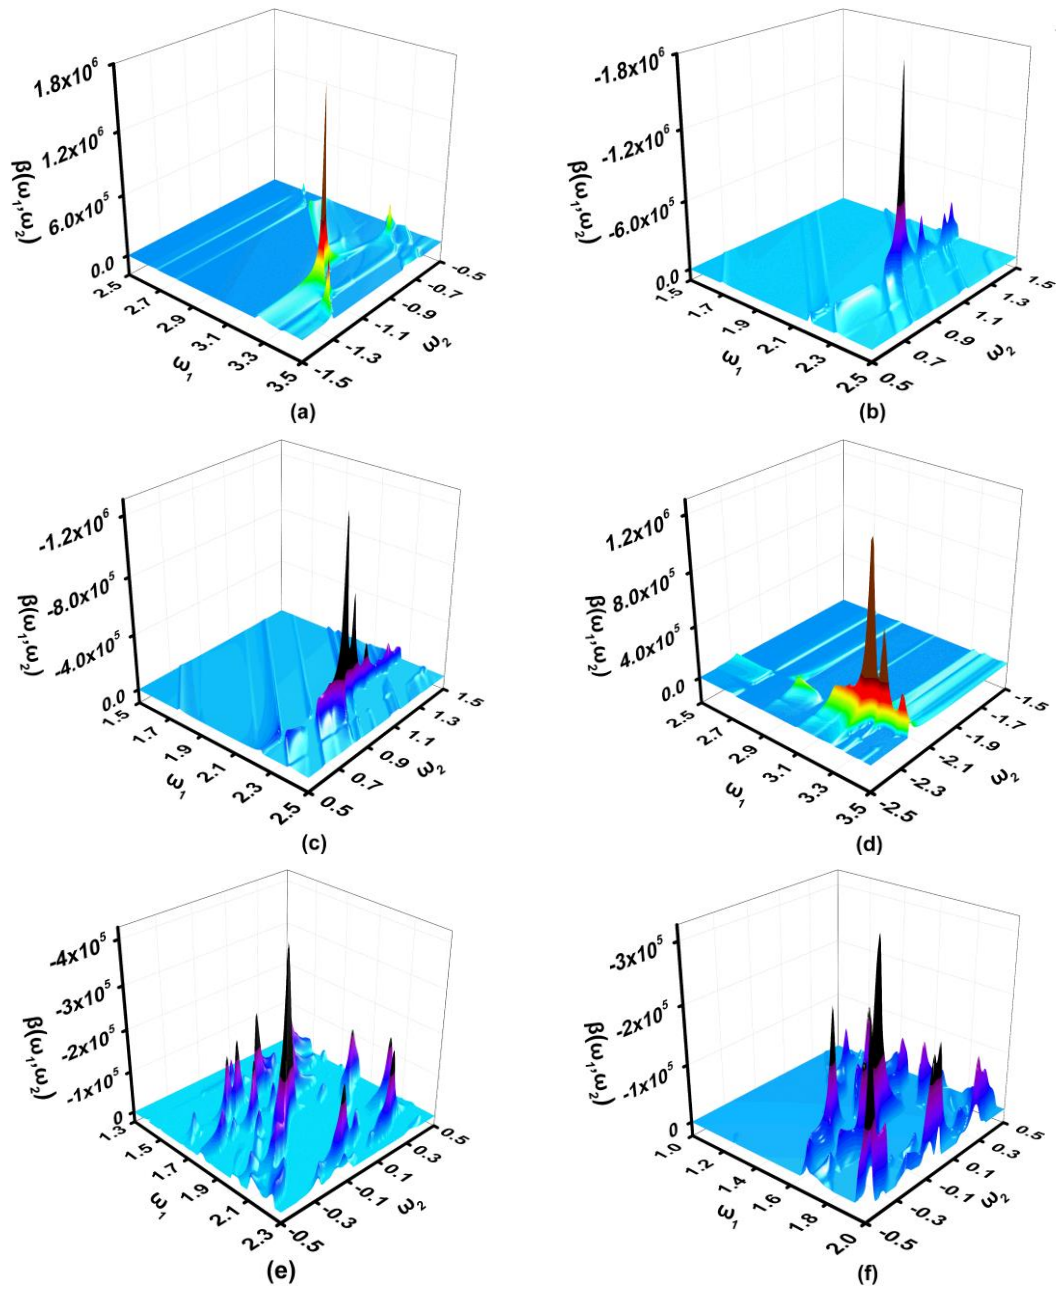

**Fig. S13** Two-dimensional second order NLO spectra of (a) and (b) TG7-B-ba, (c) and (d) TG7-N-ba, (e) TG7-NBN-ba, and (f) TG7-BNB-ba with step size of 0.005 eV [(a)  $\omega_1$  scanned from 2.50 eV to 3.50 eV and  $\omega_2$  scanned from  $-1.50$  eV to  $-0.50$  eV; (b)  $\omega_1$  scanned from 1.50 eV to 2.50 eV and  $\omega_2$  scanned from 0.50 eV to 1.50 eV; (c)  $\omega_1$  scanned from 1.50 eV to 2.50 eV and  $\omega_2$  scanned from 0.50 eV to 1.50 eV; (d)  $\omega_1$  scanned from 2.50 eV to 3.50 eV and  $\omega_2$  scanned from  $-2.50$  eV to  $-1.50$  eV; (e)  $\omega_1$  scanned from 1.30 eV to 2.30 eV and  $\omega_2$  scanned from  $-0.50$  eV to 0.50 eV; (f)  $\omega_1$  scanned from 1.00 eV to 2.00 eV and  $\omega_2$  scanned from  $-0.50$  eV to 0.50 eV].

**Table S1** The relative electronic energy differences of TGn (n=2 to 7) predicted with (U)PBE0/6-31G(d,p). The doublet in TG2, triplet in TG3, quartet in TG4, quintet in TG5, sextet in TG6, and septet in TG7 are taken as reference, respectively.

|                             | TG2    | TG4    | TG6   | TG7-BN-c-1 | TG7-BN-c-2 |
|-----------------------------|--------|--------|-------|------------|------------|
| <b>doublet</b>              | 0.00   | 18.42  | 19.05 | 13.75      | 5.80       |
| <b>quartet</b>              | 108.01 | 0.00   | 21.08 | 0.00       | 0.00       |
| <b>sextet</b>               | 163.18 | 80.89  | 0.00  | 78.41      | 67.89      |
| <b>octet</b>                | 242.47 | 162.65 | 79.69 | 136.18     | 142.74     |
|                             | TG3    | TG5    | TG7   | TG7-BNB-ab |            |
| <b>open-shell singlet</b>   | 6.78   | 20.36  | 28.22 | 7.57       |            |
| <b>closed-shell singlet</b> | 26.13  | 46.41  | 67.77 | 8.80       |            |
| <b>triplet</b>              | 0.00   | 9.56   | 21.21 | 0.00       |            |
| <b>quintet</b>              | 82.04  | 0.00   | 9.47  | 4.46       |            |
| <b>septet</b>               | 162.24 | 77.68  | 0.00  | 3.97       |            |
| <b>nonet</b>                | 242.05 | 154.00 | 72.99 | 14.79      |            |

**Table S2** The electronic properties including energy gap ( $E_{\text{gap}}$ , in eV) between the highest occupied molecular orbital ( $E_{\text{H}}$ ) and the lowest unoccupied molecular orbital ( $E_{\text{L}}$ ), the lowest vibrational frequency (LVF, in  $\text{cm}^{-1}$ ) and the dipole moment of ground state ( $D_{\text{g}}$ , in Debye), and the static first hyperpolarizability ( $\langle\beta_0\rangle$ , in  $10^{-30}$  esu), the  $\langle\beta_0\rangle$  per heavy atom ( $\langle\beta_0\rangle/N$ ) of TGn (n=2 to 6) series of molecules in closed-shell singlet predicted with PBE0/6-31G(d,p) and TD-CAM-B3LYP/6-31++G(d,p)-SOS, respectively. The relative electronic energy differences ( $\Delta E_{\text{OS-CS}}$  and  $\Delta E_{\text{T-CS}}$ , in Kcal/mol) between open-shell singlet (OS) or triplet (T) and closed-shell singlet (CS) (CS is taken as reference), and spin contamination of open-shell singlet ( $\langle S^2 \rangle$ ) obtained at the UPBE0/6-31G(d,p) level.

| Compound  | $\Delta E_{\text{OS-CS}}$ | $\Delta E_{\text{T-CS}}$ | $\langle S^2 \rangle$ | LVF    | $E_{\text{g}}$ | $E_{\text{L}}$ | $E_{\text{H}}$ | $E_{\text{gap}}$ | $\langle\beta_0\rangle$ | $\langle\beta_0\rangle/N$ |
|-----------|---------------------------|--------------------------|-----------------------|--------|----------------|----------------|----------------|------------------|-------------------------|---------------------------|
| TG2-B     | 0.00                      | 44.48                    | 0.00                  | 141.74 | 2.49           | -2.33          | -6.40          | 4.07             | -4.68                   | -0.36                     |
| TG3-B     | 0.00                      | 33.17                    | 0.00                  | 71.26  | 2.85           | -2.68          | -5.90          | 3.22             | 20.34                   | 0.93                      |
| TG4-B     | 0.00                      | 50.56                    | 0.00                  | 44.25  | 0.00           | -2.33          | -6.13          | 3.80             | 12.85                   | 0.39                      |
| TG4-B-b   | 0.00                      | 34.10                    | 0.00                  | 42.97  | 2.36           | -2.75          | -5.81          | 3.06             | 68.21                   | 2.07                      |
| TG5-B     | 0.00                      | 32.08                    | 0.00                  | 24.16  | 4.10           | -2.87          | -5.67          | 2.80             | 92.57                   | 1.52                      |
| TG6-B     | 0.00                      | 33.11                    | 0.00                  | 22.23  | 1.30           | -3.02          | -5.64          | 2.62             | 23.55                   | 0.37                      |
| TG2-N     | 0.00                      | 46.23                    | 0.00                  | 146.55 | 2.81           | -0.39          | -4.62          | 4.23             | -0.83                   | -0.08                     |
| TG3-N     | 0.00                      | 34.76                    | 0.00                  | 89.70  | 3.14           | -1.06          | -4.39          | 3.33             | 20.48                   | 0.93                      |
| TG4-N     | 0.00                      | 52.03                    | 0.00                  | 62.65  | 0.00           | -0.98          | -4.90          | 3.92             | 3.04                    | 0.09                      |
| TG4-N-b   | 0.00                      | 36.17                    | 0.00                  | 62.06  | 2.85           | -1.27          | -4.42          | 3.15             | 78.03                   | 2.36                      |
| TG5-N     | 0.00                      | 35.04                    | 0.00                  | 42.38  | 4.65           | -1.41          | -4.35          | 2.94             | 79.87                   | 1.74                      |
| TG6-N     | 0.00                      | 36.11                    | 0.00                  | 30.72  | 1.49           | -1.53          | -4.28          | 2.75             | 49.99                   | 0.82                      |
| TG2-NBN   | 0.00                      | 5.51                     | 0.00                  | 139.82 | 2.74           | -1.35          | -3.65          | 2.30             | 22.03                   | 1.69                      |
| TG3-NBN   | 0.00                      | 4.64                     | 0.00                  | 75.19  | 0.03           | -1.59          | -3.54          | 1.95             | 81.72                   | 3.71                      |
| TG4-NBN   | 0.00                      | 13.19                    | 0.00                  | 53.97  | 0.00           | -1.62          | -3.80          | 2.18             | 40.33                   | 1.22                      |
| TG4-NBN-b | 0.00                      | 3.09                     | 0.00                  | 52.98  | 0.69           | -1.84          | -3.64          | 1.80             | 14.67                   | 0.44                      |
| TG5-NBN   | 0.00                      | 5.04                     | 0.00                  | 39.98  | 1.98           | -1.96          | -3.72          | 1.75             | -200.85                 | 4.37                      |
| TG6-NBN   | 0.00                      | 3.71                     | 0.00                  | 29.73  | 0.19           | -2.05          | -3.67          | 1.62             | 126.48                  | 2.07                      |
| TG2-BNB   | -4.05                     | -1.35                    | 0.14                  | 144.00 | 2.84           | -3.37          | -5.32          | 1.95             | —                       | —                         |
| TG3-BNB   | -8.96                     | -5.73                    | 2.94                  | 80.54  | 0.06           | -3.58          | -5.21          | 1.63             | —                       | —                         |
| TG4-BNB   | -1.86                     | 7.36                     | 1.14                  | 48.79  | 0.00           | -3.43          | -5.25          | 1.82             | —                       | —                         |
| TG4-BNB-b | -9.87                     | -7.71                    | 5.70                  | 47.99  | 0.46           | -3.54          | -5.10          | 1.56             | —                       | —                         |
| TG5-BNB   | -4.47                     | -5.32                    | 4.26                  | 27.73  | 1.90           | -3.52          | -5.01          | 1.49             | —                       | —                         |
| TG6-BNB   | -10.43                    | -10.97                   | 10.29                 | 9.36   | 0.53           | -3.62          | -5.03          | 1.41             | —                       | —                         |

**Table S3** Major electronic spectra absorption peaks with transition nature in TG7 series of molecules ( $f$  is the oscillator strength in arbitrary unit,  $E$  is the transition energy in eV unit,  $\lambda$  is the wavelength in nm unit, TNMC to  $\langle\beta_0\rangle$  is the transition nature of electron excitation with major contribution to  $\langle\beta_0\rangle$ ,  $\langle\beta_0\rangle_{\text{con}}$  is contribution value to  $\langle\beta_0\rangle$  in  $10^{-30}$  esu unit).

| Compounds                                                                       | $f$                                                                             | $E$    | $\lambda$ | Transition                      | TNMC to $\langle\beta_0\rangle$                                              | $\langle\beta_0\rangle_{\text{con}}$               |
|---------------------------------------------------------------------------------|---------------------------------------------------------------------------------|--------|-----------|---------------------------------|------------------------------------------------------------------------------|----------------------------------------------------|
| TG7-B-ba<br>(C <sub>72</sub> H <sub>24</sub> B <sub>6</sub> )                   | 0.4972                                                                          | 2.19   | 566.3     | S <sub>0</sub> →S <sub>1</sub>  | H→L (87.29%)                                                                 | 236.31                                             |
|                                                                                 | 1.1611                                                                          | 2.69   | 460.7     | S <sub>0</sub> →S <sub>3</sub>  | H→L+1 (45.27%)<br>H-1→L (42.57%)                                             | 60.43                                              |
|                                                                                 | 0.4314                                                                          | 3.14   | 395.4     | S <sub>0</sub> →S <sub>6</sub>  | H-1→L+1 (51.66%)<br>H-2→L (22.79%)                                           | 21.80                                              |
| TG7-N-ba<br>(C <sub>72</sub> H <sub>24</sub> N <sub>6</sub> )                   | 0.4388                                                                          | 2.26   | 549.5     | S <sub>0</sub> →S <sub>1</sub>  | H→L (84.25%)                                                                 | 199.88                                             |
|                                                                                 | 0.9443                                                                          | 2.73   | 454.4     | S <sub>0</sub> →S <sub>3</sub>  | H-1→L (52.06%)<br>H→L+1 (31.10%)<br>H-2→L (35.62%)                           | 41.19                                              |
|                                                                                 | 0.2178                                                                          | 2.88   | 430.0     | S <sub>0</sub> →S <sub>4</sub>  | H-1→L+1 (24.70%)<br>H→L+3 (24.39%)                                           | 28.10                                              |
|                                                                                 | 0.1539                                                                          | 3.09   | 400.9     | S <sub>0</sub> →S <sub>6</sub>  | H-1→L+1 (36.81%)<br>H→L+3 (36.56%)<br>H-2→L (33.43%)                         | 15.90                                              |
|                                                                                 | 0.6377                                                                          | 3.30   | 375.7     | S <sub>0</sub> →S <sub>9</sub>  | H-1→L+1 (22.59%)<br>H-1→L+2 (15.90%)<br>H→L+3 (9.94%)<br>H-2→L (15.93%)      | 10.49                                              |
|                                                                                 | 0.1831                                                                          | 3.36   | 368.6     | S <sub>0</sub> →S <sub>10</sub> | H-1→L+2 (25.52%)<br>H→L+8 (24.58%)<br>H→L+3 (9.74%)                          | 11.73                                              |
|                                                                                 | 0.4538                                                                          | 3.56   | 348.0     | S <sub>0</sub> →S <sub>14</sub> | H-2→L+1 (26.40%)<br>H→L+10 (14.80%)                                          | 17.93                                              |
|                                                                                 | 0.5665                                                                          | 4.39   | 282.7     | S <sub>0</sub> →S <sub>41</sub> | H-2→L+3 (20.66%)<br>H→L+16 (25.84%)                                          | 30.18                                              |
|                                                                                 | 0.4901                                                                          | 4.57   | 271.1     | S <sub>0</sub> →S <sub>51</sub> | H-2→L+7 (16.00%)<br>H-3→L+4 (12.80%)                                         | 28.30                                              |
|                                                                                 | TG7-NBN-ba<br>(C <sub>60</sub> H <sub>24</sub> B <sub>6</sub> N <sub>12</sub> ) | 0.0223 | 0.97      | 1273.7                          | S <sub>0</sub> →S <sub>2</sub>                                               | H-1→L+4 (48.57%)<br>H→L+5 (29.25%)<br>H→L (29.69%) |
| 0.4582                                                                          |                                                                                 | 1.61   | 770.8     | S <sub>0</sub> →S <sub>7</sub>  | H-2→L (22.03%)<br>H-1→L+1 (13.81%)<br>H→L+2 (38.01%)                         | 135.91                                             |
| 0.0534                                                                          |                                                                                 | 1.73   | 718.3     | S <sub>0</sub> →S <sub>9</sub>  | H-2→L+2 (20.90%)<br>H-2→L (13.48%)<br>H-1→L+1 (32.52%)                       | 67.66                                              |
| 0.1181                                                                          |                                                                                 | 1.83   | 677.6     | S <sub>0</sub> →S <sub>12</sub> | H-1→L+3 (21.95%)<br>H-2→L+2 (15.23%)<br>H→L+2 (18.56%)                       | 239.36                                             |
| 0.1341                                                                          |                                                                                 | 2.18   | 569.6     | S <sub>0</sub> →S <sub>21</sub> | H-5→L+3 (14.76%)<br>H-1→L+3 (14.58%)<br>H-2→L+5 (12.96%)<br>H-2→L+2 (22.53%) | 108.98                                             |
| 0.6694                                                                          |                                                                                 | 2.50   | 496.6     | S <sub>0</sub> →S <sub>31</sub> | H-5→L+3 (17.62%)<br>H-5→L+1 (14.38%)                                         | 251.02                                             |
| TG7-BNB-ba<br>(C <sub>60</sub> H <sub>24</sub> B <sub>12</sub> N <sub>6</sub> ) |                                                                                 | 0.0291 | 0.76      | 1622.7                          | S <sub>0</sub> →S <sub>2</sub>                                               | H-4→L (49.68%)<br>H-5→L+1 (29.26%)<br>H→L (61.28%) |
|                                                                                 | 0.3271                                                                          | 1.38   | 895.7     | S <sub>0</sub> →S <sub>6</sub>  | H-3→L+4 (11.50%)<br>H-3→L+1 (11.49%)                                         | 126.27                                             |

|                                                                                                |        |      |       |                          |                                                          |         |
|------------------------------------------------------------------------------------------------|--------|------|-------|--------------------------|----------------------------------------------------------|---------|
|                                                                                                | 0.4427 | 1.64 | 757.7 | $S_0 \rightarrow S_{10}$ | H-3→L+1 (47.76%)                                         | 112.59  |
|                                                                                                | 0.2097 | 1.66 | 747.8 | $S_0 \rightarrow S_{11}$ | H-2→L+2 (28.02%)<br>H-1→L (26.26%)<br>H→L+2 (22.38%)     | 407.69  |
|                                                                                                | 0.3322 | 1.95 | 635.1 | $S_0 \rightarrow S_{17}$ | H-2→L+1 (31.39%)<br>H-1→L+3 (22.38%)<br>H-1→L (13.07%)   | 211.36  |
|                                                                                                | 0.0716 | 1.99 | 624.4 | $S_0 \rightarrow S_{18}$ | H-3→L+3 (11.90%)<br>H-1→L+3 (18.85%)<br>H-2→L+1 (18.71%) | 78.97   |
|                                                                                                | 0.3265 | 2.28 | 544.2 | $S_0 \rightarrow S_{27}$ | H→L+4 (15.01%)<br>H-1→L (14.52%)<br>H-1→L+5 (35.05%)     | 52.69   |
|                                                                                                | 0.7353 | 2.28 | 542.8 | $S_0 \rightarrow S_1$    | H→L (90.26%)                                             | 41.05   |
| TG7-H6-ba (C <sub>78</sub> H <sub>30</sub> )                                                   | 0.1713 | 4.45 | 278.4 | $S_0 \rightarrow S_{29}$ | H-4→L+1 (17.84%)<br>H→L+15 (15.58%)                      | 6.80    |
|                                                                                                | 0.1090 | 5.06 | 245.3 | $S_0 \rightarrow S_{57}$ | H→L+17 (18.97%)<br>H→L+11 (12.82%)                       | 6.88    |
|                                                                                                | 0.7906 | 2.24 | 553.5 | $S_0 \rightarrow S_1$    | H→L (88.09%)                                             | 63.95   |
| TG7-H6-ba-3NO <sub>2</sub><br>(C <sub>78</sub> H <sub>27</sub> N <sub>3</sub> O <sub>6</sub> ) | 1.5789 | 2.73 | 453.9 | $S_0 \rightarrow S_3$    | H-1→L (38.42%)<br>H→L+1 (45.66%)                         | 54.09   |
|                                                                                                | 0.4268 | 3.21 | 385.7 | $S_0 \rightarrow S_7$    | H-1→L+1 (30.96%)<br>H→L+3 (25.92%)                       | 25.73   |
| TG7-H6-ba-2NO <sub>2</sub><br>(C <sub>78</sub> H <sub>28</sub> N <sub>2</sub> O <sub>4</sub> ) | 1.4120 | 2.79 | 444.6 | $S_0 \rightarrow S_3$    | H-1→L (39.21%)<br>H→L+1 (44.44%)                         | -218.40 |
|                                                                                                | 0.7508 | 2.28 | 543.7 | $S_0 \rightarrow S_1$    | H→L (90.13%)                                             | -56.18  |
| TG7-H6-ba-1NO <sub>2</sub><br>(C <sub>78</sub> H <sub>29</sub> NO <sub>2</sub> )               | 0.3907 | 2.84 | 436.2 | $S_0 \rightarrow S_3$    | H-1→L (21.21%)<br>H→L+1 (28.79%)                         | -61.10  |
|                                                                                                | 0.6445 | 4.59 | 269.9 | $S_0 \rightarrow S_{39}$ | H→L+2 (22.82%)<br>H-2→L+3 (13.34%)                       | -41.80  |
